# Supplementary material for: Cytoprotective Effect of Vitamin D on Doxorubicin-Induced Cardiac Toxicity in Triple Negative Breast Cancer
Source: MDPI journal article supplement (doi:10.3390/ijms22147439), 2021-07-12
Supplement: s1 [file s1]

**Supplemental Figure 5**

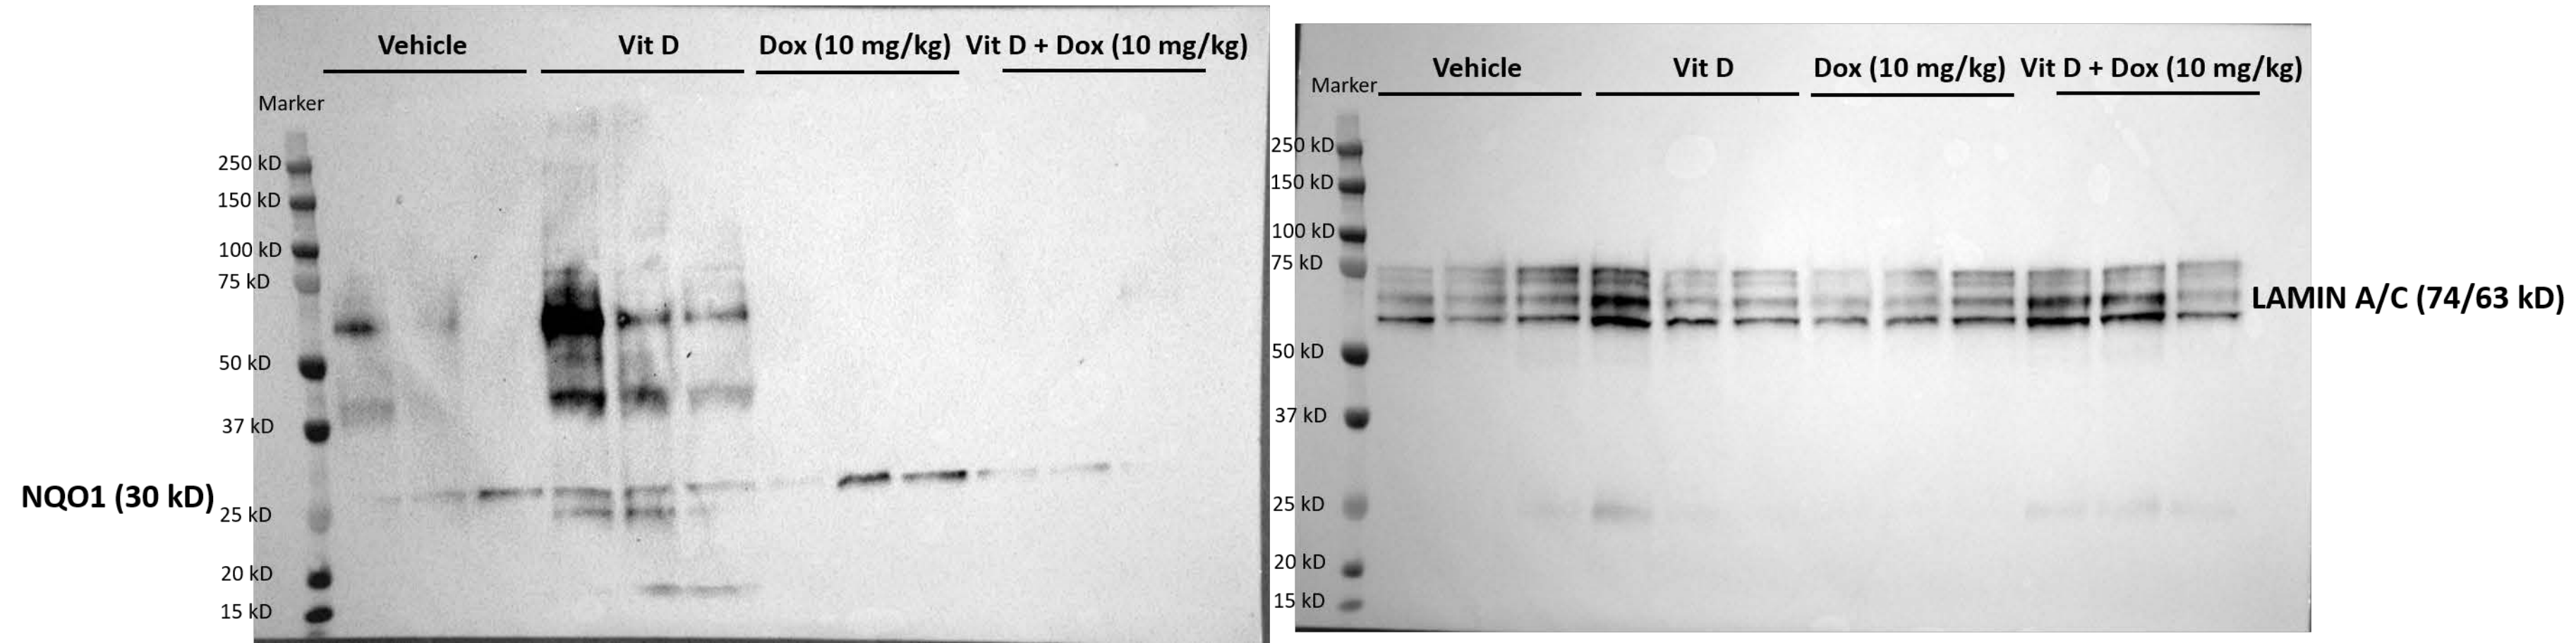

**Supplemental Figure 6**

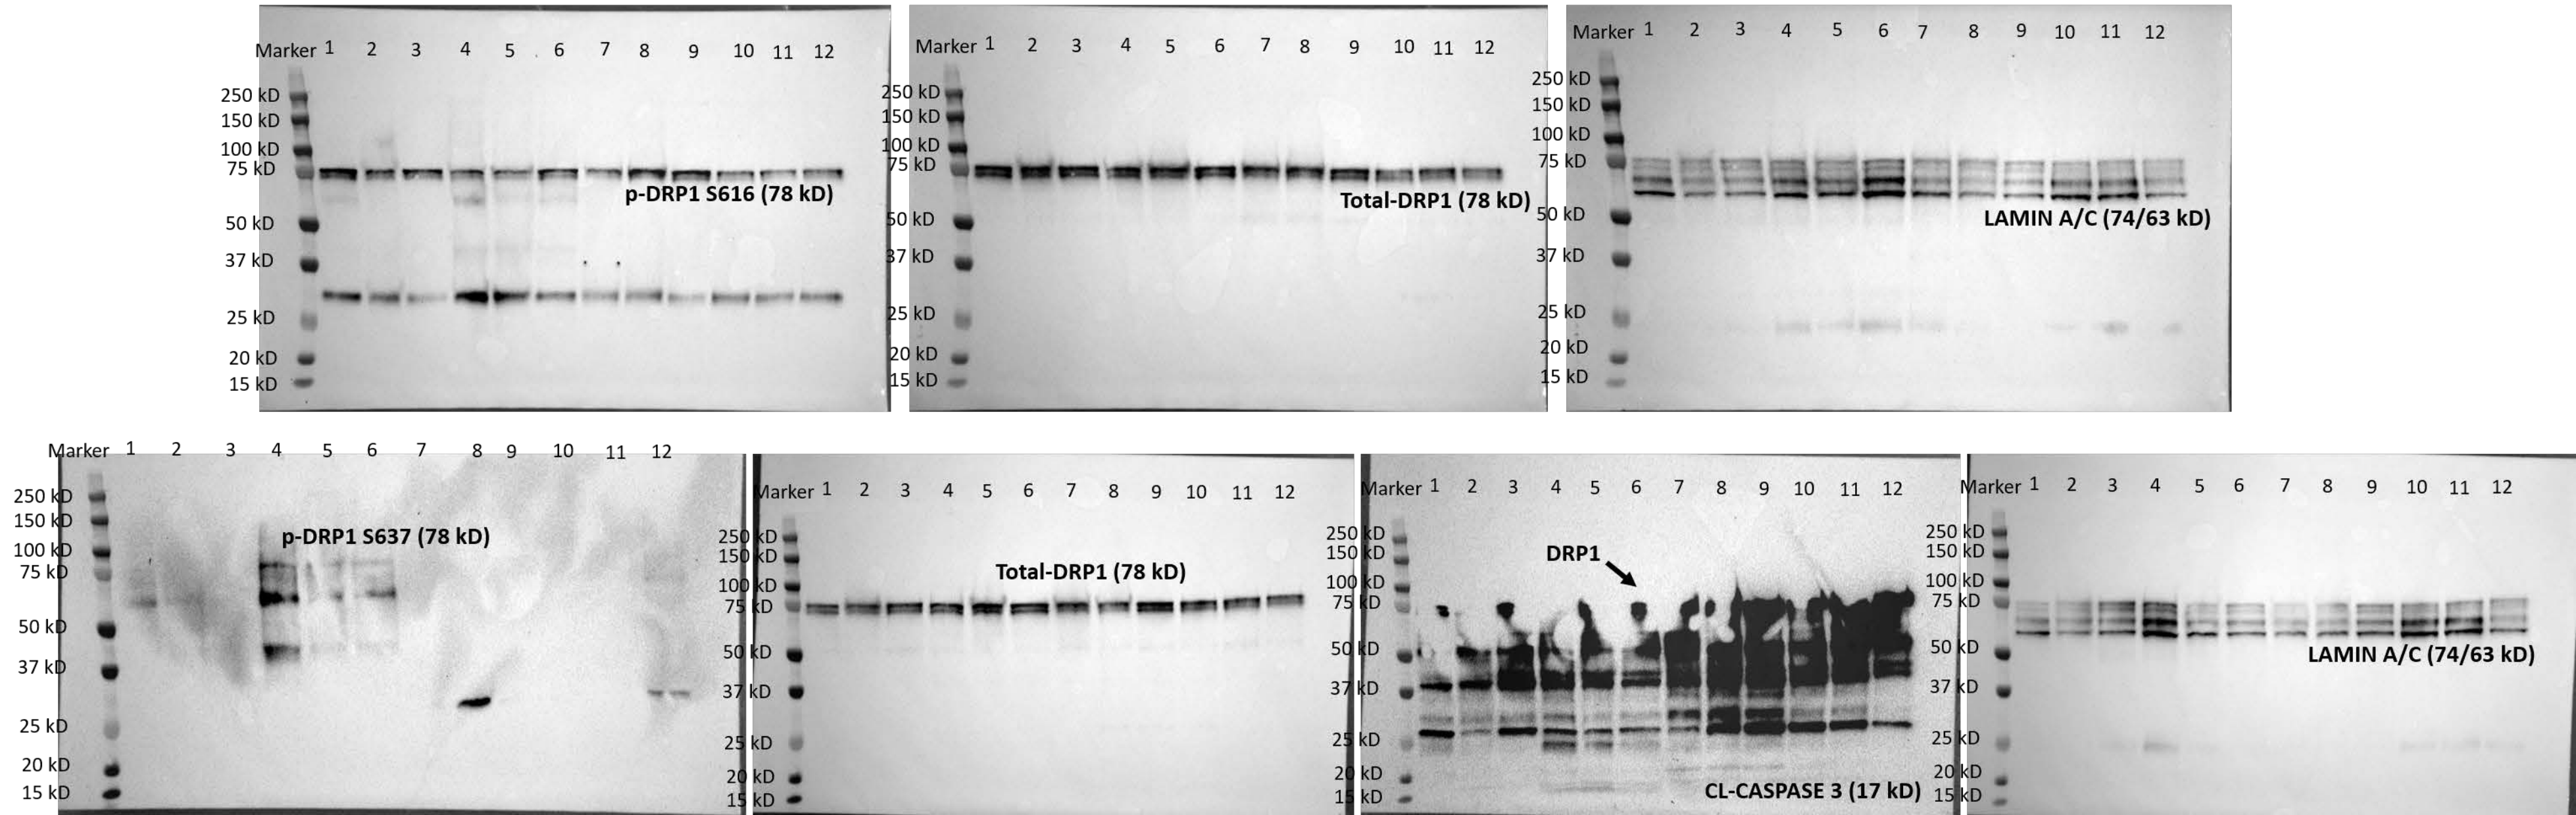

Lanes 1, 2, 3: Vehicle treated hearts; Lanes 4, 5, 6: Vit D treated hearts; Lanes 7, 8, 9: Dox (10 mg/kg) treated hearts; Lanes 10, 11, 12: Vit D + Dox (10 mg/kg) treated hearts.
