# Supplementary material for: Cytoprotective Effect of Vitamin D on Doxorubicin-Induced Cardiac Toxicity in Triple Negative Breast Cancer
Source: Int J Mol Sci. 2021 Jul 12;22(14):7439. doi: 10.3390/ijms22147439 (PMC8305038; doi:10.3390/ijms22147439)
Supplement: Supplementary file 1 [file ijms-22-07439-s001.zip]

Archive with 19 entries (19 files):
- Figure S1.tif
- Figure S2.tif
- Figure S3.tif
- Figure S4.tif
- Figure S5.tif
- Figure S6.tif
- Supplemental Videos/Video S1_Vehicle.mp4
- Supplemental Videos/Video S10_Dox (10 mg).mp4
- Supplemental Videos/Video S11_Vit D + Dox (10 mg).mp4
- Supplemental Videos/Video S12_Vit D + Dox (10 mg).mp4
- Supplemental Videos/Video S2_Vehicle.mp4
- Supplemental Videos/Video S3_Vit D.mp4
- Supplemental Videos/Video S4_Vit D.mp4
- Supplemental Videos/Video S5_Dox (6 mg).mp4
- Supplemental Videos/Video S6_Dox (6 mg).mp4
- Supplemental Videos/Video S7_Vit D + Dox (6 mg).mp4
- Supplemental Videos/Video S8_Vit D + Dox (6 mg).mp4
- Supplemental Videos/Video S9_Dox (10 mg).mp4
- Uncropped Full gels.pdf
